# Supplementary material for: Effects of harvest stages and lactic acid bacteria additives on the nutritional quality of silage derived from triticale, rye, and oat on the Qinghai-Tibet Plateau
Source: PeerJ. 2023 Aug 3;11:e15772. doi: 10.7717/peerj.15772 (PMC10404394; doi:10.7717/peerj.15772)
Supplement: Supplemental Information 1 [file peerj-11-15772-s001.xlsx]

## Sheet: Dry matter yiueld
				Forage species	Harvest stages	Dry matter yield
	1	B1	A1	Triticale	heading stage	8.59119
	1	B1	A1	Triticale	heading stage	4.85516
	1	B1	A1	Triticale	heading stage	8.05815
	2	B2	A1	Triticale	flowering stage	9.74443
	2	B2	A1	Triticale	flowering stage	10.3403
	2	B2	A1	Triticale	flowering stage	9.20442
	3	B3	A1	Triticale	grouting stage	9.84243
	3	B3	A1	Triticale	grouting stage	10.9576
	3	B3	A1	Triticale	grouting stage	12.0847
	4	B4	A1	Triticale	milky stage	14.1806
	4	B4	A1	Triticale	milky stage	15.7937
	4	B4	A1	Triticale	milky stage	12.3712
	5	B5	A1	Triticale	dough stage	17.8911
	5	B5	A1	Triticale	dough stage	20.4123
	5	B5	A1	Triticale	dough stage	15.2268
	6	B1	A2	Rye	heading stage	7.06118
	6	B1	A2	Rye	heading stage	7.75459
	6	B1	A2	Rye	heading stage	9.76056
	7	B2	A2	Rye	flowering stage	8.99588
	7	B2	A2	Rye	flowering stage	9.82708
	7	B2	A2	Rye	flowering stage	9.9013
	8	B3	A2	Rye	grouting stage	12.2706
	8	B3	A2	Rye	grouting stage	9.13479
	8	B3	A2	Rye	grouting stage	11.465
	9	B4	A2	Rye	milky stage	10.5267
	9	B4	A2	Rye	milky stage	11.0021
	9	B4	A2	Rye	milky stage	13.3345
	10	B5	A2	Rye	dough stage	12.0186
	10	B5	A2	Rye	dough stage	11.5061
	10	B5	A2	Rye	dough stage	12.589
	11	B1	A3	Oat	heading stage	6.47411
	11	B1	A3	Oat	heading stage	6.28679
	11	B1	A3	Oat	heading stage	6.96232
	12	B2	A3	Oat	flowering stage	8.01518
	12	B2	A3	Oat	flowering stage	9.23722
	12	B2	A3	Oat	flowering stage	10.0473
	13	B3	A3	Oat	grouting stage	11.2827
	13	B3	A3	Oat	grouting stage	9.22657
	13	B3	A3	Oat	grouting stage	9.09034
	14	B4	A3	Oat	milky stage	11.8055
	14	B4	A3	Oat	milky stage	8.91025
	14	B4	A3	Oat	milky stage	11.2765
	15	B5	A3	Oat	dough stage	13.8115
	15	B5	A3	Oat	dough stage	10.632
	15	B5	A3	Oat	dough stage	9.72122

## Sheet: One factor
			Forage species	Harvest stages	Additives	CP	NDF	ADF	IVDMD	RFV
		1	Triticale	heading stage	Additive-free	14.764	50.88	27.53	72.74	132.99
		1	Triticale	heading stage	Additive-free	14.604	51.08	29.805	71.98	131.085
		1	Triticale	heading stage	Additive-free	14.258	50.61	30.095	72.06	132.449
		1	Rye	heading stage	Additive-free	13.586	51.01	30.5	69.14	126.086
		1	Rye	heading stage	Additive-free	13.1687	49.39	29.945	71.78	135.194
		1	Rye	heading stage	Additive-free	13.255	50.2	30.69	70.76	131.122
		1	Oat	heading stage	Additive-free	12.508	46.46	30.94	68.7	137.553
		1	Oat	heading stage	Additive-free	12.245	46.59	29.74	68.93	137.628
		1	Oat	heading stage	Additive-free	12.645	45.38	30.755	69	141.441
		1	Triticale	flowering stage	Additive-free	11.702	54.93	37.195	60.36	102.219
		1	Triticale	flowering stage	Additive-free	11.67	52.92	37.38	59.48	104.554
		1	Triticale	flowering stage	Additive-free	11.734	54.15	36.605	62.78	107.849
		1	Rye	flowering stage	Additive-free	10.953	60.12	43.76	54.52	84.3584
		1	Rye	flowering stage	Additive-free	12.088	63.66	44.01	55.43	80.9972
		1	Rye	flowering stage	Additive-free	11.62	61.88	43.49	55.14	82.8911
		1	Oat	flowering stage	Additive-free	11.118	56.58	38.07	60.27	99.09
		1	Oat	flowering stage	Additive-free	10.679	56.13	36.545	62.76	104.011
		1	Oat	flowering stage	Additive-free	11.445	59.88	37.345	58.98	91.6251
		1	Triticale	grouting stage	Additive-free	11.394	54.67	38.175	64.55	109.834
		1	Triticale	grouting stage	Additive-free	11.339	54.25	39.08	64.17	110.033
		1	Triticale	grouting stage	Additive-free	11.178	55.85	37.365	66.78	111.228
		1	Rye	grouting stage	Additive-free	11.421	62.88	42.335	58.62	86.7211
		1	Rye	grouting stage	Additive-free	11.471	63.24	43.37	57.73	84.9183
		1	Rye	grouting stage	Additive-free	11.643	62.87	40.72	57.1	84.4859
		1	Oat	grouting stage	Additive-free	10.321	59.56	38.67	60.88	95.0849
		1	Oat	grouting stage	Additive-free	10.684	59.54	40	60.36	94.3044
		1	Oat	grouting stage	Additive-free	10.147	60.12	37.91	61.4	95.0038
		1	Triticale	milky stage	Additive-free	9.3918	52.88	31.26	66.08	116.244
		1	Triticale	milky stage	Additive-free	9.5249	52.78	30.05	66.06	116.429
		1	Triticale	milky stage	Additive-free	9.406	49.44	29.085	68.18	128.283
		1	Rye	milky stage	Additive-free	9.2636	58.34	40.02	55.42	88.3673
		1	Rye	milky stage	Additive-free	10.182	56.16	38.8	55.7	92.2613
		1	Rye	milky stage	Additive-free	9.7154	58.26	39.99	56.76	90.6282
		1	Oat	milky stage	Additive-free	9.05	52.18	33.96	64.18	114.416
		1	Oat	milky stage	Additive-free	9.18	52.76	34.67	64.72	114.11
		1	Oat	milky stage	Additive-free	8.92	51.36	32.91	65.6	118.815
		1	Triticale	dough stage	Additive-free	8.741	51.54	29.81	68.22	123.129
		1	Triticale	dough stage	Additive-free	8.488	51.42	28.98	68.72	124.32
		1	Triticale	dough stage	Additive-free	8.787	54.72	30.9	67.2	114.239
		1	Rye	dough stage	Additive-free	8.368	59.1	35.38	60.13	94.6445
		1	Rye	dough stage	Additive-free	8.5089	60	37.77	56.3	87.2868
		1	Rye	dough stage	Additive-free	8.5303	59.55	38.665	57.01	89.0555
		1	Oat	dough stage	Additive-free	6.712	55.66	34.425	63.93	106.845
		1	Oat	dough stage	Additive-free	6.4632	53.02	34.685	63.33	111.112
		1	Oat	dough stage	Additive-free	6.2101	54.64	36.535	61.2	104.191
		2	Triticale	heading stage	Sila-max	13.927	48.5	29.87	70.44	135.104
		2	Triticale	heading stage	Sila-max	14.464	45.96	27.12	73.36	148.481
		2	Triticale	heading stage	Sila-max	14.336	47.95	31.635	71.62	138.943
		2	Rye	heading stage	Sila-max	13.032	47.25	30.765	69.24	136.316
		2	Rye	heading stage	Sila-max	13.205	47.55	29.78	70	136.943
		2	Rye	heading stage	Sila-max	13.12	48.44	31.12	67.72	130.048
		2	Oat	heading stage	Sila-max	13.2	49.92	32.085	64.82	120.789
		2	Oat	heading stage	Sila-max	12.866	46.52	29.555	70.11	140.195
		2	Oat	heading stage	Sila-max	12.583	46.84	28.585	73.54	146.049
		2	Triticale	flowering stage	Sila-max	11.302	55.76	36.28	62.62	104.468
		2	Triticale	flowering stage	Sila-max	11.558	54.33	35.92	61.54	105.368
		2	Triticale	flowering stage	Sila-max	11.503	55.36	38.48	60.78	102.131
		2	Rye	flowering stage	Sila-max	12.318	60.18	45.725	51.48	79.5752
		2	Rye	flowering stage	Sila-max	11.752	64.38	41.685	59.1	85.3941
		2	Rye	flowering stage	Sila-max	12.113	62.13	41.285	59.72	89.4149
		2	Oat	flowering stage	Sila-max	11.068	57.32	38.5	59.36	96.3339
		2	Oat	flowering stage	Sila-max	11.435	58.44	36.47	62.78	99.9316
		2	Oat	flowering stage	Sila-max	10.723	58.89	37.28	62.44	98.6309
		2	Triticale	grouting stage	Sila-max	12.973	54.89	36.225	67.02	113.58
		2	Triticale	grouting stage	Sila-max	11.748	52.7	34.26	69.94	123.454
		2	Triticale	grouting stage	Sila-max	10.522	53.97	36.325	66.12	113.965
		2	Rye	grouting stage	Sila-max	11.396	58.97	44.55	54.32	85.688
		2	Rye	grouting stage	Sila-max	11.533	61.08	43.455	55.28	84.19
		2	Rye	grouting stage	Sila-max	11.57	60.09	40.26	59.98	92.853
		2	Oat	grouting stage	Sila-max	10.582	59.14	37.835	61.89	97.3488
		2	Oat	grouting stage	Sila-max	10.499	58.68	36.295	61.01	96.7169
		2	Oat	grouting stage	Sila-max	9.9592	61.28	39.85	59.26	89.9569
		2	Triticale	milky stage	Sila-max	9.4911	50.32	27.55	69.66	128.776
		2	Triticale	milky stage	Sila-max	9.2031	51.32	28.3	70.52	127.825
		2	Triticale	milky stage	Sila-max	9.5943	51.9	25.45	72.04	129.121
		2	Rye	milky stage	Sila-max	9.6032	56.46	38.46	62.78	103.436
		2	Rye	milky stage	Sila-max	9.557	57.14	36.89	63.9	104.028
		2	Rye	milky stage	Sila-max	10.141	56.78	39.955	58.78	96.2999
		2	Oat	milky stage	Sila-max	9.25	51.39	31.93	68.32	123.669
		2	Oat	milky stage	Sila-max	10.137	53.74	32.45	67.68	117.153
		2	Oat	milky stage	Sila-max	8.411	48.82	33	65.62	125.035
		2	Triticale	dough stage	Sila-max	8.7883	50.38	29.505	67.44	124.523
		2	Triticale	dough stage	Sila-max	8.6219	52.38	28.25	69.02	122.575
		2	Triticale	dough stage	Sila-max	8.6175	51.55	27.84	69.9	126.136
		2	Rye	dough stage	Sila-max	8.3893	60.13	34.75	59.96	92.7603
		2	Rye	dough stage	Sila-max	8.4356	61.9	36.03	60.78	91.3401
		2	Rye	dough stage	Sila-max	8.4819	59.12	33.54	61.24	96.359
		2	Oat	dough stage	Sila-max	6.3428	53.6	35.82	62.2	107.949
		2	Oat	dough stage	Sila-max	6.8047	52.08	33.56	65.52	117.029
		2	Oat	dough stage	Sila-max	6.0659	53.1	34.465	64.96	113.8
		3	Triticale	heading stage	Sila-mix	12.904	49.67	30.48	68.56	128.401
		3	Triticale	heading stage	Sila-mix	12.6162	48.62	28.51	69.98	133.891
		3	Triticale	heading stage	Sila-mix	12.854	51.11	31.01	70.62	128.533
		3	Rye	heading stage	Sila-mix	14.139	48.57	28.37	72.1	138.089
		3	Rye	heading stage	Sila-mix	13.836	46.45	27.53	70.89	141.968
		3	Rye	heading stage	Sila-mix	13.909	45.07	29.46	73.38	151.454
		3	Oat	heading stage	Sila-mix	12.03	48.52	30.39	69.76	133.745
		3	Oat	heading stage	Sila-mix	12.501	48.19	31.27	66.56	128.484
		3	Oat	heading stage	Sila-mix	12.236	47.25	30.33	70.54	138.875
		3	Triticale	flowering stage	Sila-mix	11.59	53.32	32.86	67	116.89
		3	Triticale	flowering stage	Sila-mix	11.391	56.06	33.87	65.28	108.322
		3	Triticale	flowering stage	Sila-mix	11.328	55.8	32.59	68.14	113.595
		3	Rye	flowering stage	Sila-mix	12.144	59.12	42.59	56.81	89.3886
		3	Rye	flowering stage	Sila-mix	11.963	60.02	43.85	52.78	81.8022
		3	Rye	flowering stage	Sila-mix	12.003	60.77	41.455	58.68	89.824
		3	Oat	flowering stage	Sila-mix	11.042	56.78	35.64	62.99	103.197
		3	Oat	flowering stage	Sila-mix	10.735	58.29	36.69	60.13	95.9597
		3	Oat	flowering stage	Sila-mix	11.319	54.02	33.875	66.76	114.962
		3	Triticale	grouting stage	Sila-mix	11.116	51.39	36.97	64.8	117.297
		3	Triticale	grouting stage	Sila-mix	10.459	52.21	37.27	67	119.375
		3	Triticale	grouting stage	Sila-mix	10.595	51.35	38.17	65.78	119.164
		3	Rye	grouting stage	Sila-mix	11.351	65.99	41.64	58.36	82.2676
		3	Rye	grouting stage	Sila-mix	10.984	64.17	42.01	56.67	82.151
		3	Rye	grouting stage	Sila-mix	11.095	62.36	41.615	59.81	89.2194
		3	Oat	grouting stage	Sila-mix	9.3207	58.39	36.85	60.9	97.022
		3	Oat	grouting stage	Sila-mix	9.8435	48.46	34.83	66.1	126.885
		3	Oat	grouting stage	Sila-mix	10.215	56.54	33.02	67.08	110.364
		3	Triticale	milky stage	Sila-mix	9.4786	52.22	28.92	68.42	121.881
		3	Triticale	milky stage	Sila-mix	9.3825	50.44	27.51	69.28	127.769
		3	Triticale	milky stage	Sila-mix	9.3046	51.33	29.76	68.58	124.285
		3	Rye	milky stage	Sila-mix	9.5712	56.34	39.165	59.33	97.9601
		3	Rye	milky stage	Sila-mix	9.8895	59.78	40.44	57.76	89.8799
		3	Rye	milky stage	Sila-mix	8.6086	57.68	39.145	60.9	98.2163
		3	Oat	milky stage	Sila-mix	8.6011	51.68	33.47	66.44	119.591
		3	Oat	milky stage	Sila-mix	9.167	53.74	32.36	67.38	116.634
		3	Oat	milky stage	Sila-mix	8.4285	55.22	34.35	65.34	110.071
		3	Triticale	dough stage	Sila-mix	8.6567	53.02	29.58	69.54	122.007
		3	Triticale	dough stage	Sila-mix	8.6955	55.64	28.425	71.14	118.937
		3	Triticale	dough stage	Sila-mix	8.5445	52.58	26.925	72.3	127.911
		3	Rye	dough stage	Sila-mix	8.5801	60.32	37.405	58.13	89.6459
		3	Rye	dough stage	Sila-mix	8.2131	62.68	37.71	56.94	84.5045
		3	Rye	dough stage	Sila-mix	8.2718	56.6	36.54	59.88	98.414
		3	Oat	dough stage	Sila-mix	6.9126	53.88	33.415	66.29	114.449
		3	Oat	dough stage	Sila-mix	6.6717	54.46	34.26	64.52	110.207
		3	Oat	dough stage	Sila-mix	6.4749	54.16	34.74	63.32	108.756

## Sheet: Two factors
	Interactive effects of two factors
		forages×stages												forages×additives
					CP	NDF	ADF	IVDMD	RFV								CP	NDF	ADF	IVDMD	RFV
	1	Triticale	heading	Additive-free	14.764	50.88	27.53	72.74	132.99			1	1	Triticale	Additive-free	heading stage	14.764	50.88	27.53	72.74	132.99
	1	Triticale	heading	Additive-free	14.604	51.08	29.805	71.98	131.085			1	1	Triticale	Additive-free	heading stage	14.604	51.08	29.805	71.98	131.085
	1	Triticale	heading	Additive-free	14.258	50.61	30.095	72.06	132.449			1	1	Triticale	Additive-free	heading stage	14.258	50.61	30.095	72.06	132.449
	1	Triticale	heading	max	13.927	48.5	29.87	70.44	135.104			1	1	Triticale	Additive-free	flowering	11.702	54.93	37.195	60.36	102.219
	1	Triticale	heading	max	14.464	45.96	27.12	73.36	148.481			1	1	Triticale	Additive-free	flowering	11.67	52.92	37.38	59.48	104.554
	1	Triticale	heading	max	14.336	47.95	31.635	71.62	138.943			1	1	Triticale	Additive-free	flowering	11.734	54.15	36.605	62.78	107.849
	1	Triticale	heading	mix	14.139	48.57	28.37	72.1	138.089			1	1	Triticale	Additive-free	grouting	11.394	54.67	38.175	64.55	109.834
	1	Triticale	heading	mix	13.836	46.45	27.53	70.89	141.968			1	1	Triticale	Additive-free	grouting	11.339	54.25	39.08	64.17	110.033
	1	Triticale	heading	mix	13.909	45.07	29.46	73.38	151.454			1	1	Triticale	Additive-free	grouting	11.178	55.85	37.365	66.78	111.228
	2	Triticale	flowering	Additive-free	11.702	54.93	37.195	60.36	102.219			1	1	Triticale	Additive-free	milky	9.3918	52.88	31.26	66.08	116.244
	2	Triticale	flowering	Additive-free	11.67	52.92	37.38	59.48	104.554			1	1	Triticale	Additive-free	milky	9.5249	52.78	30.05	66.06	116.429
	2	Triticale	flowering	Additive-free	11.734	54.15	36.605	62.78	107.849			1	1	Triticale	Additive-free	milky	9.406	49.44	29.085	68.18	128.283
	2	Triticale	flowering	max	11.302	55.76	36.28	62.62	104.468			1	1	Triticale	Additive-free	dough	8.741	51.54	29.81	68.22	123.129
	2	Triticale	flowering	max	11.558	54.33	35.92	61.54	105.368			1	1	Triticale	Additive-free	dough	8.488	51.42	28.98	68.72	124.32
	2	Triticale	flowering	max	11.503	55.36	38.48	60.78	102.131			1	1	Triticale	Additive-free	dough	8.787	54.72	30.9	67.2	114.239
	2	Triticale	flowering	mix	11.59	53.32	32.86	67	116.89			1	2	Triticale	Additive-free	heading stage	13.586	51.01	30.5	69.14	126.086
	2	Triticale	flowering	mix	11.391	56.06	33.87	65.28	108.322			1	2	Triticale	Additive-free	heading stage	13.1687	49.39	29.945	71.78	135.194
	2	Triticale	flowering	mix	11.328	55.8	32.59	68.14	113.595			1	2	Triticale	Additive-free	heading stage	13.255	50.2	30.69	70.76	131.122
	3	Triticale	grouting	Additive-free	11.394	54.67	38.175	64.55	109.834			1	2	Triticale	Additive-free	flowering	10.953	60.12	43.76	54.52	84.3584
	3	Triticale	grouting	Additive-free	11.339	54.25	39.08	64.17	110.033			1	2	Triticale	Additive-free	flowering	12.088	63.66	44.01	55.43	80.9972
	3	Triticale	grouting	Additive-free	11.178	55.85	37.365	66.78	111.228			1	2	Triticale	Additive-free	flowering	11.62	61.88	43.49	55.14	82.8911
	3	Triticale	grouting	max	12.973	54.89	36.225	67.02	113.58			1	2	Triticale	Additive-free	grouting	11.421	62.88	42.335	58.62	86.7211
	3	Triticale	grouting	max	11.748	52.7	34.26	69.94	123.454			1	2	Triticale	Additive-free	grouting	11.471	63.24	43.37	57.73	84.9183
	3	Triticale	grouting	max	10.522	53.97	36.325	66.12	113.965			1	2	Triticale	Additive-free	grouting	11.643	62.87	40.72	57.1	84.4859
	3	Triticale	grouting	mix	11.116	51.39	36.97	64.8	117.297			1	2	Triticale	Additive-free	milky	9.2636	58.34	40.02	55.42	88.3673
	3	Triticale	grouting	mix	10.459	52.21	37.27	67	119.375			1	2	Triticale	Additive-free	milky	10.182	56.16	38.8	55.7	92.2613
	3	Triticale	grouting	mix	10.595	51.35	38.17	65.78	119.164			1	2	Triticale	Additive-free	milky	9.7154	58.26	39.99	56.76	90.6282
	4	Triticale	milky	Additive-free	9.3918	52.88	31.26	66.08	116.244			1	2	Triticale	Additive-free	dough	8.368	59.1	35.38	60.13	94.6445
	4	Triticale	milky	Additive-free	9.5249	52.78	30.05	66.06	116.429			1	2	Triticale	Additive-free	dough	8.5089	60	37.77	56.3	87.2868
	4	Triticale	milky	Additive-free	9.406	49.44	29.085	68.18	128.283			1	2	Triticale	Additive-free	dough	8.5303	59.55	38.665	57.01	89.0555
	4	Triticale	milky	max	9.4911	50.32	27.55	69.66	128.776			2	3	Triticale	Additive-free	heading stage	12.508	46.46	30.94	68.7	137.553
	4	Triticale	milky	max	9.2031	51.32	28.3	70.52	127.825			2	3	Triticale	Additive-free	heading stage	12.245	46.59	29.74	68.93	137.628
	4	Triticale	milky	max	9.5943	51.9	25.45	72.04	129.121			2	3	Triticale	Additive-free	heading stage	12.645	45.38	30.755	69	141.441
	4	Triticale	milky	mix	9.4786	52.22	28.92	68.42	121.881			2	3	Triticale	Additive-free	flowering	11.118	56.58	38.07	60.27	99.09
	4	Triticale	milky	mix	9.3825	50.44	27.51	69.28	127.769			2	3	Triticale	Additive-free	flowering	10.679	56.13	36.545	62.76	104.011
	4	Triticale	milky	mix	9.3046	51.33	29.76	68.58	124.285			2	3	Triticale	Additive-free	flowering	11.445	59.88	37.345	58.98	91.6251
	5	Triticale	dough	Additive-free	8.741	51.54	29.81	68.22	123.129			2	3	Triticale	Additive-free	grouting	10.321	59.56	38.67	60.88	95.0849
	5	Triticale	dough	Additive-free	8.488	51.42	28.98	68.72	124.32			2	3	Triticale	Additive-free	grouting	10.684	59.54	40	60.36	94.3044
	5	Triticale	dough	Additive-free	8.787	54.72	30.9	67.2	114.239			2	3	Triticale	Additive-free	grouting	10.147	60.12	37.91	61.4	95.0038
	5	Triticale	dough	max	8.7883	50.38	29.505	67.44	124.523			2	3	Triticale	Additive-free	milky	9.05	52.18	33.96	64.18	114.416
	5	Triticale	dough	max	8.6219	52.38	28.25	69.02	122.575			2	3	Triticale	Additive-free	milky	9.18	52.76	34.67	64.72	114.11
	5	Triticale	dough	max	8.6175	51.55	27.84	69.9	126.136			2	3	Triticale	Additive-free	milky	8.92	51.36	32.91	65.6	118.815
	5	Triticale	dough	mix	8.6567	53.02	29.58	69.54	122.007			2	3	Triticale	Additive-free	dough	6.712	55.66	34.425	63.93	106.845
	5	Triticale	dough	mix	8.6955	55.64	28.425	71.14	118.937			2	3	Triticale	Additive-free	dough	6.4632	53.02	34.685	63.33	111.112
	5	Triticale	dough	mix	8.5445	52.58	26.925	72.3	127.911			2	3	Triticale	Additive-free	dough	6.2101	54.64	36.535	61.2	104.191
	6	Rye	heading	Additive-free	13.586	51.01	30.5	69.14	126.086			1	4	Rye	max	heading stage	13.927	48.5	29.87	70.44	135.104
	6	Rye	heading	Additive-free	13.1687	49.39	29.945	71.78	135.194			1	4	Rye	max	heading stage	14.464	45.96	27.12	73.36	148.481
	6	Rye	heading	Additive-free	13.255	50.2	30.69	70.76	131.122			1	4	Rye	max	heading stage	14.336	47.95	31.635	71.62	138.943
	6	Rye	heading	max	13.032	47.25	30.765	69.24	136.316			1	4	Rye	max	flowering	11.302	55.76	36.28	62.62	104.468
	6	Rye	heading	max	13.205	47.55	29.78	70	136.943			1	4	Rye	max	flowering	11.558	54.33	35.92	61.54	105.368
	6	Rye	heading	max	13.12	48.44	31.12	67.72	130.048			1	4	Rye	max	flowering	11.503	55.36	38.48	60.78	102.131
	6	Rye	heading	mix	12.904	49.67	30.48	68.56	128.401			1	4	Rye	max	grouting	12.973	54.89	36.225	67.02	113.58
	6	Rye	heading	mix	12.6162	48.62	28.51	69.98	133.891			1	4	Rye	max	grouting	11.748	52.7	34.26	69.94	123.454
	6	Rye	heading	mix	12.854	51.11	31.01	70.62	128.533			1	4	Rye	max	grouting	10.522	53.97	36.325	66.12	113.965
	7	Rye	flowering	Additive-free	10.953	60.12	43.76	54.52	84.3584			1	4	Rye	max	milky	9.4911	50.32	27.55	69.66	128.776
	7	Rye	flowering	Additive-free	12.088	63.66	44.01	55.43	80.9972			1	4	Rye	max	milky	9.2031	51.32	28.3	70.52	127.825
	7	Rye	flowering	Additive-free	11.62	61.88	43.49	55.14	82.8911			1	4	Rye	max	milky	9.5943	51.9	25.45	72.04	129.121
	7	Rye	flowering	max	12.318	60.18	45.725	51.48	79.5752			1	4	Rye	max	dough	8.7883	50.38	29.505	67.44	124.523
	7	Rye	flowering	max	11.752	64.38	41.685	59.1	85.3941			1	4	Rye	max	dough	8.6219	52.38	28.25	69.02	122.575
	7	Rye	flowering	max	12.113	62.13	41.285	59.72	89.4149			1	4	Rye	max	dough	8.6175	51.55	27.84	69.9	126.136
	7	Rye	flowering	mix	12.144	59.12	42.59	56.81	89.3886			2	5	Rye	max	heading stage	13.032	47.25	30.765	69.24	136.316
	7	Rye	flowering	mix	11.963	60.02	43.85	52.78	81.8022			2	5	Rye	max	heading stage	13.205	47.55	29.78	70	136.943
	7	Rye	flowering	mix	12.003	60.77	41.455	58.68	89.824			2	5	Rye	max	heading stage	13.12	48.44	31.12	67.72	130.048
	8	Rye	grouting	Additive-free	11.421	62.88	42.335	58.62	86.7211			2	5	Rye	max	flowering	12.318	60.18	45.725	51.48	79.5752
	8	Rye	grouting	Additive-free	11.471	63.24	43.37	57.73	84.9183			2	5	Rye	max	flowering	11.752	64.38	41.685	59.1	85.3941
	8	Rye	grouting	Additive-free	11.643	62.87	40.72	57.1	84.4859			2	5	Rye	max	flowering	12.113	62.13	41.285	59.72	89.4149
	8	Rye	grouting	max	11.396	58.97	44.55	54.32	85.688			2	5	Rye	max	grouting	11.396	58.97	44.55	54.32	85.688
	8	Rye	grouting	max	11.533	61.08	43.455	55.28	84.19			2	5	Rye	max	grouting	11.533	61.08	43.455	55.28	84.19
	8	Rye	grouting	max	11.57	60.09	40.26	59.98	92.853			2	5	Rye	max	grouting	11.57	60.09	40.26	59.98	92.853
	8	Rye	grouting	mix	11.351	65.99	41.64	58.36	82.2676			2	5	Rye	max	milky	9.6032	56.46	38.46	62.78	103.436
	8	Rye	grouting	mix	10.984	64.17	42.01	56.67	82.151			2	5	Rye	max	milky	9.557	57.14	36.89	63.9	104.028
	8	Rye	grouting	mix	11.095	62.36	41.615	59.81	89.2194			2	5	Rye	max	milky	10.141	56.78	39.955	58.78	96.2999
	9	Rye	milky	Additive-free	9.2636	58.34	40.02	55.42	88.3673			2	5	Rye	max	dough	8.3893	60.13	34.75	59.96	92.7603
	9	Rye	milky	Additive-free	10.182	56.16	38.8	55.7	92.2613			2	5	Rye	max	dough	8.4356	61.9	36.03	60.78	91.3401
	9	Rye	milky	Additive-free	9.7154	58.26	39.99	56.76	90.6282			2	5	Rye	max	dough	8.4819	59.12	33.54	61.24	96.359
	9	Rye	milky	max	9.6032	56.46	38.46	62.78	103.436			1	6	Rye	max	heading stage	13.2	49.92	32.085	64.82	120.789
	9	Rye	milky	max	9.557	57.14	36.89	63.9	104.028			1	6	Rye	max	heading stage	12.866	46.52	29.555	70.11	140.195
	9	Rye	milky	max	10.141	56.78	39.955	58.78	96.2999			1	6	Rye	max	heading stage	12.583	46.84	28.585	73.54	146.049
	9	Rye	milky	mix	9.5712	56.34	39.165	59.33	97.9601			1	6	Rye	max	flowering	11.068	57.32	38.5	59.36	96.3339
	9	Rye	milky	mix	9.8895	59.78	40.44	57.76	89.8799			1	6	Rye	max	flowering	11.435	58.44	36.47	62.78	99.9316
	9	Rye	milky	mix	8.6086	57.68	39.145	60.9	98.2163			1	6	Rye	max	flowering	10.723	58.89	37.28	62.44	98.6309
	10	Rye	dough	Additive-free	8.368	59.1	35.38	60.13	94.6445			1	6	Rye	max	grouting	10.582	59.14	37.835	61.89	97.3488
	10	Rye	dough	Additive-free	8.5089	60	37.77	56.3	87.2868			1	6	Rye	max	grouting	10.499	58.68	36.295	61.01	96.7169
	10	Rye	dough	Additive-free	8.5303	59.55	38.665	57.01	89.0555			1	6	Rye	max	grouting	9.9592	61.28	39.85	59.26	89.9569
	10	Rye	dough	max	8.3893	60.13	34.75	59.96	92.7603			1	6	Rye	max	milky	9.25	51.39	31.93	68.32	123.669
	10	Rye	dough	max	8.4356	61.9	36.03	60.78	91.3401			1	6	Rye	max	milky	10.137	53.74	32.45	67.68	117.153
	10	Rye	dough	max	8.4819	59.12	33.54	61.24	96.359			1	6	Rye	max	milky	8.411	48.82	33	65.62	125.035
	10	Rye	dough	mix	8.5801	60.32	37.405	58.13	89.6459			1	6	Rye	max	dough	6.3428	53.6	35.82	62.2	107.949
	10	Rye	dough	mix	8.2131	62.68	37.71	56.94	84.5045			1	6	Rye	max	dough	6.8047	52.08	33.56	65.52	117.029
	10	Rye	dough	mix	8.2718	56.6	36.54	59.88	98.414			1	6	Rye	max	dough	6.0659	53.1	34.465	64.96	113.8
	11	Oat	heading	Additive-free	12.508	46.46	30.94	68.7	137.553			2	7	Oat	mix	heading stage	14.139	48.57	28.37	72.1	138.089
	11	Oat	heading	Additive-free	12.245	46.59	29.74	68.93	137.628			2	7	Oat	mix	heading stage	13.836	46.45	27.53	70.89	141.968
	11	Oat	heading	Additive-free	12.645	45.38	30.755	69	141.441			2	7	Oat	mix	heading stage	13.909	45.07	29.46	73.38	151.454
	11	Oat	heading	max	13.2	49.92	32.085	64.82	120.789			2	7	Oat	mix	flowering	11.59	53.32	32.86	67	116.89
	11	Oat	heading	max	12.866	46.52	29.555	70.11	140.195			2	7	Oat	mix	flowering	11.391	56.06	33.87	65.28	108.322
	11	Oat	heading	max	12.583	46.84	28.585	73.54	146.049			2	7	Oat	mix	flowering	11.328	55.8	32.59	68.14	113.595
	11	Oat	heading	mix	12.03	48.52	30.39	69.76	133.745			2	7	Oat	mix	grouting	11.116	51.39	36.97	64.8	117.297
	11	Oat	heading	mix	12.501	48.19	31.27	66.56	128.484			2	7	Oat	mix	grouting	10.459	52.21	37.27	67	119.375
	11	Oat	heading	mix	12.236	47.25	30.33	70.54	138.875			2	7	Oat	mix	grouting	10.595	51.35	38.17	65.78	119.164
	12	Oat	flowering	Additive-free	11.118	56.58	38.07	60.27	99.09			2	7	Oat	mix	milky	9.4786	52.22	28.92	68.42	121.881
	12	Oat	flowering	Additive-free	10.679	56.13	36.545	62.76	104.011			2	7	Oat	mix	milky	9.3825	50.44	27.51	69.28	127.769
	12	Oat	flowering	Additive-free	11.445	59.88	37.345	58.98	91.6251			2	7	Oat	mix	milky	9.3046	51.33	29.76	68.58	124.285
	12	Oat	flowering	max	11.068	57.32	38.5	59.36	96.3339			2	7	Oat	mix	dough	8.6567	53.02	29.58	69.54	122.007
	12	Oat	flowering	max	11.435	58.44	36.47	62.78	99.9316			2	7	Oat	mix	dough	8.6955	55.64	28.425	71.14	118.937
	12	Oat	flowering	max	10.723	58.89	37.28	62.44	98.6309			2	7	Oat	mix	dough	8.5445	52.58	26.925	72.3	127.911
	12	Oat	flowering	mix	11.042	56.78	35.64	62.99	103.197			1	8	Oat	mix	heading stage	12.904	49.67	30.48	68.56	128.401
	12	Oat	flowering	mix	10.735	58.29	36.69	60.13	95.9597			1	8	Oat	mix	heading stage	12.6162	48.62	28.51	69.98	133.891
	12	Oat	flowering	mix	11.319	54.02	33.875	66.76	114.962			1	8	Oat	mix	heading stage	12.854	51.11	31.01	70.62	128.533
	13	Oat	grouting	Additive-free	10.321	59.56	38.67	60.88	95.0849			1	8	Oat	mix	flowering	12.144	59.12	42.59	56.81	89.3886
	13	Oat	grouting	Additive-free	10.684	59.54	40	60.36	94.3044			1	8	Oat	mix	flowering	11.963	60.02	43.85	52.78	81.8022
	13	Oat	grouting	Additive-free	10.147	60.12	37.91	61.4	95.0038			1	8	Oat	mix	flowering	12.003	60.77	41.455	58.68	89.824
	13	Oat	grouting	max	10.582	59.14	37.835	61.89	97.3488			1	8	Oat	mix	grouting	11.351	65.99	41.64	58.36	82.2676
	13	Oat	grouting	max	10.499	58.68	36.295	61.01	96.7169			1	8	Oat	mix	grouting	10.984	64.17	42.01	56.67	82.151
	13	Oat	grouting	max	9.9592	61.28	39.85	59.26	89.9569			1	8	Oat	mix	grouting	11.095	62.36	41.615	59.81	89.2194
	13	Oat	grouting	mix	9.3207	58.39	36.85	60.9	97.022			1	8	Oat	mix	milky	9.5712	56.34	39.165	59.33	97.9601
	13	Oat	grouting	mix	9.8435	48.46	34.83	66.1	126.885			1	8	Oat	mix	milky	9.8895	59.78	40.44	57.76	89.8799
	13	Oat	grouting	mix	10.215	56.54	33.02	67.08	110.364			1	8	Oat	mix	milky	8.6086	57.68	39.145	60.9	98.2163
	14	Oat	milky	Additive-free	9.05	52.18	33.96	64.18	114.416			1	8	Oat	mix	dough	8.5801	60.32	37.405	58.13	89.6459
	14	Oat	milky	Additive-free	9.18	52.76	34.67	64.72	114.11			1	8	Oat	mix	dough	8.2131	62.68	37.71	56.94	84.5045
	14	Oat	milky	Additive-free	8.92	51.36	32.91	65.6	118.815			1	8	Oat	mix	dough	8.2718	56.6	36.54	59.88	98.414
	14	Oat	milky	max	9.25	51.39	31.93	68.32	123.669			2	9	Oat	mix	heading stage	12.03	48.52	30.39	69.76	133.745
	14	Oat	milky	max	10.137	53.74	32.45	67.68	117.153			2	9	Oat	mix	heading stage	12.501	48.19	31.27	66.56	128.484
	14	Oat	milky	max	8.411	48.82	33	65.62	125.035			2	9	Oat	mix	heading stage	12.236	47.25	30.33	70.54	138.875
	14	Oat	milky	mix	8.6011	51.68	33.47	66.44	119.591			2	9	Oat	mix	flowering	11.042	56.78	35.64	62.99	103.197
	14	Oat	milky	mix	9.167	53.74	32.36	67.38	116.634			2	9	Oat	mix	flowering	10.735	58.29	36.69	60.13	95.9597
	14	Oat	milky	mix	8.4285	55.22	34.35	65.34	110.071			2	9	Oat	mix	flowering	11.319	54.02	33.875	66.76	114.962
	15	Oat	dough	Additive-free	6.712	55.66	34.425	63.93	106.845			2	9	Oat	mix	grouting	9.3207	58.39	36.85	60.9	97.022
	15	Oat	dough	Additive-free	6.4632	53.02	34.685	63.33	111.112			2	9	Oat	mix	grouting	9.8435	48.46	34.83	66.1	126.885
	15	Oat	dough	Additive-free	6.2101	54.64	36.535	61.2	104.191			2	9	Oat	mix	grouting	10.215	56.54	33.02	67.08	110.364
	15	Oat	dough	max	6.3428	53.6	35.82	62.2	107.949			2	9	Oat	mix	milky	8.6011	51.68	33.47	66.44	119.591
	15	Oat	dough	max	6.8047	52.08	33.56	65.52	117.029			2	9	Oat	mix	milky	9.167	53.74	32.36	67.38	116.634
	15	Oat	dough	max	6.0659	53.1	34.465	64.96	113.8			2	9	Oat	mix	milky	8.4285	55.22	34.35	65.34	110.071
	15	Oat	dough	mix	6.9126	53.88	33.415	66.29	114.449			2	9	Oat	mix	dough	6.9126	53.88	33.415	66.29	114.449
	15	Oat	dough	mix	6.6717	54.46	34.26	64.52	110.207			2	9	Oat	mix	dough	6.6717	54.46	34.26	64.52	110.207
	15	Oat	dough	mix	6.4749	54.16	34.74	63.32	108.756			2	9	Oat	mix	dough	6.4749	54.16	34.74	63.32	108.756
		stages×additives
					CP	NDF	ADF	IVDMD	RFV
	1	heading	Additive-free	Triticale	14.764	50.88	27.53	72.74	132.99
	1	heading	Additive-free	Triticale	14.604	51.08	29.805	71.98	131.085
	1	heading	Additive-free	Triticale	14.258	50.61	30.095	72.06	132.449
	1	heading	Additive-free	Rye	13.586	51.01	30.5	69.14	126.086
	1	heading	Additive-free	Rye	13.1687	49.39	29.945	71.78	135.194
	1	heading	Additive-free	Rye	13.255	50.2	30.69	70.76	131.122
	1	heading	Additive-free	Oat	12.508	46.46	30.94	68.7	137.553
	1	heading	Additive-free	Oat	12.245	46.59	29.74	68.93	137.628
	1	heading	Additive-free	Oat	12.645	45.38	30.755	69	141.441
	2	heading	max	Triticale	13.927	48.5	29.87	70.44	135.104
	2	heading	max	Triticale	14.464	45.96	27.12	73.36	148.481
	2	heading	max	Triticale	14.336	47.95	31.635	71.62	138.943
	2	heading	max	Rye	13.032	47.25	30.765	69.24	136.316
	2	heading	max	Rye	13.205	47.55	29.78	70	136.943
	2	heading	max	Rye	13.12	48.44	31.12	67.72	130.048
	2	heading	max	Oat	13.2	49.92	32.085	64.82	120.789
	2	heading	max	Oat	12.866	46.52	29.555	70.11	140.195
	2	heading	max	Oat	12.583	46.84	28.585	73.54	146.049
	3	heading	mix	Triticale	14.139	48.57	28.37	72.1	138.089
	3	heading	mix	Triticale	13.836	46.45	27.53	70.89	141.968
	3	heading	mix	Triticale	13.909	45.07	29.46	73.38	151.454
	3	heading	mix	Rye	12.904	49.67	30.48	68.56	128.401
	3	heading	mix	Rye	12.6162	48.62	28.51	69.98	133.891
	3	heading	mix	Rye	12.854	51.11	31.01	70.62	128.533
	3	heading	mix	Oat	12.03	48.52	30.39	69.76	133.745
	3	heading	mix	Oat	12.501	48.19	31.27	66.56	128.484
	3	heading	mix	Oat	12.236	47.25	30.33	70.54	138.875
	4	flowering	Additive-free	Triticale	11.702	54.93	37.195	60.36	102.219
	4	flowering	Additive-free	Triticale	11.67	52.92	37.38	59.48	104.554
	4	flowering	Additive-free	Triticale	11.734	54.15	36.605	62.78	107.849
	4	flowering	Additive-free	Rye	10.953	60.12	43.76	54.52	84.3584
	4	flowering	Additive-free	Rye	12.088	63.66	44.01	55.43	80.9972
	4	flowering	Additive-free	Rye	11.62	61.88	43.49	55.14	82.8911
	4	flowering	Additive-free	Oat	11.118	56.58	38.07	60.27	99.09
	4	flowering	Additive-free	Oat	10.679	56.13	36.545	62.76	104.011
	4	flowering	Additive-free	Oat	11.445	59.88	37.345	58.98	91.6251
	5	flowering	max	Triticale	11.302	55.76	36.28	62.62	104.468
	5	flowering	max	Triticale	11.558	54.33	35.92	61.54	105.368
	5	flowering	max	Triticale	11.503	55.36	38.48	60.78	102.131
	5	flowering	max	Rye	12.318	60.18	45.725	51.48	79.5752
	5	flowering	max	Rye	11.752	64.38	41.685	59.1	85.3941
	5	flowering	max	Rye	12.113	62.13	41.285	59.72	89.4149
	5	flowering	max	Oat	11.068	57.32	38.5	59.36	96.3339
	5	flowering	max	Oat	11.435	58.44	36.47	62.78	99.9316
	5	flowering	max	Oat	10.723	58.89	37.28	62.44	98.6309
	6	flowering	mix	Triticale	11.59	53.32	32.86	67	116.89
	6	flowering	mix	Triticale	11.391	56.06	33.87	65.28	108.322
	6	flowering	mix	Triticale	11.328	55.8	32.59	68.14	113.595
	6	flowering	mix	Rye	12.144	59.12	42.59	56.81	89.3886
	6	flowering	mix	Rye	11.963	60.02	43.85	52.78	81.8022
	6	flowering	mix	Rye	12.003	60.77	41.455	58.68	89.824
	6	flowering	mix	Oat	11.042	56.78	35.64	62.99	103.197
	6	flowering	mix	Oat	10.735	58.29	36.69	60.13	95.9597
	6	flowering	mix	Oat	11.319	54.02	33.875	66.76	114.962
	7	grouting	Additive-free	Triticale	11.394	54.67	38.175	64.55	109.834
	7	grouting	Additive-free	Triticale	11.339	54.25	39.08	64.17	110.033
	7	grouting	Additive-free	Triticale	11.178	55.85	37.365	66.78	111.228
	7	grouting	Additive-free	Rye	11.421	62.88	42.335	58.62	86.7211
	7	grouting	Additive-free	Rye	11.471	63.24	43.37	57.73	84.9183
	7	grouting	Additive-free	Rye	11.643	62.87	40.72	57.1	84.4859
	7	grouting	Additive-free	Oat	10.321	59.56	38.67	60.88	95.0849
	7	grouting	Additive-free	Oat	10.684	59.54	40	60.36	94.3044
	7	grouting	Additive-free	Oat	10.147	60.12	37.91	61.4	95.0038
	8	grouting	max	Triticale	12.973	54.89	36.225	67.02	113.58
	8	grouting	max	Triticale	11.748	52.7	34.26	69.94	123.454
	8	grouting	max	Triticale	10.522	53.97	36.325	66.12	113.965
	8	grouting	max	Rye	11.396	58.97	44.55	54.32	85.688
	8	grouting	max	Rye	11.533	61.08	43.455	55.28	84.19
	8	grouting	max	Rye	11.57	60.09	40.26	59.98	92.853
	8	grouting	max	Oat	10.582	59.14	37.835	61.89	97.3488
	8	grouting	max	Oat	10.499	58.68	36.295	61.01	96.7169
	8	grouting	max	Oat	9.9592	61.28	39.85	59.26	89.9569
	9	grouting	mix	Triticale	11.116	51.39	36.97	64.8	117.297
	9	grouting	mix	Triticale	10.459	52.21	37.27	67	119.375
	9	grouting	mix	Triticale	10.595	51.35	38.17	65.78	119.164
	9	grouting	mix	Rye	11.351	65.99	41.64	58.36	82.2676
	9	grouting	mix	Rye	10.984	64.17	42.01	56.67	82.151
	9	grouting	mix	Rye	11.095	62.36	41.615	59.81	89.2194
	9	grouting	mix	Oat	9.3207	58.39	36.85	60.9	97.022
	9	grouting	mix	Oat	9.8435	48.46	34.83	66.1	126.885
	9	grouting	mix	Oat	10.215	56.54	33.02	67.08	110.364
	10	milky	Additive-free	Triticale	9.3918	52.88	31.26	66.08	116.244
	10	milky	Additive-free	Triticale	9.5249	52.78	30.05	66.06	116.429
	10	milky	Additive-free	Triticale	9.406	49.44	29.085	68.18	128.283
	10	milky	Additive-free	Rye	9.2636	58.34	40.02	55.42	88.3673
	10	milky	Additive-free	Rye	10.182	56.16	38.8	55.7	92.2613
	10	milky	Additive-free	Rye	9.7154	58.26	39.99	56.76	90.6282
	10	milky	Additive-free	Oat	9.05	52.18	33.96	64.18	114.416
	10	milky	Additive-free	Oat	9.18	52.76	34.67	64.72	114.11
	10	milky	Additive-free	Oat	8.92	51.36	32.91	65.6	118.815
	11	milky	max	Triticale	9.4911	50.32	27.55	69.66	128.776
	11	milky	max	Triticale	9.2031	51.32	28.3	70.52	127.825
	11	milky	max	Triticale	9.5943	51.9	25.45	72.04	129.121
	11	milky	max	Rye	9.6032	56.46	38.46	62.78	103.436
	11	milky	max	Rye	9.557	57.14	36.89	63.9	104.028
	11	milky	max	Rye	10.141	56.78	39.955	58.78	96.2999
	11	milky	max	Oat	9.25	51.39	31.93	68.32	123.669
	11	milky	max	Oat	10.137	53.74	32.45	67.68	117.153
	11	milky	max	Oat	8.411	48.82	33	65.62	125.035
	12	milky	mix	Triticale	9.4786	52.22	28.92	68.42	121.881
	12	milky	mix	Triticale	9.3825	50.44	27.51	69.28	127.769
	12	milky	mix	Triticale	9.3046	51.33	29.76	68.58	124.285
	12	milky	mix	Rye	9.5712	56.34	39.165	59.33	97.9601
	12	milky	mix	Rye	9.8895	59.78	40.44	57.76	89.8799
	12	milky	mix	Rye	8.6086	57.68	39.145	60.9	98.2163
	12	milky	mix	Oat	8.6011	51.68	33.47	66.44	119.591
	12	milky	mix	Oat	9.167	53.74	32.36	67.38	116.634
	12	milky	mix	Oat	8.4285	55.22	34.35	65.34	110.071
	13	dough	Additive-free	Triticale	8.741	51.54	29.81	68.22	123.129
	13	dough	Additive-free	Triticale	8.488	51.42	28.98	68.72	124.32
	13	dough	Additive-free	Triticale	8.787	54.72	30.9	67.2	114.239
	13	dough	Additive-free	Rye	8.368	59.1	35.38	60.13	94.6445
	13	dough	Additive-free	Rye	8.5089	60	37.77	56.3	87.2868
	13	dough	Additive-free	Rye	8.5303	59.55	38.665	57.01	89.0555
	13	dough	Additive-free	Oat	6.712	55.66	34.425	63.93	106.845
	13	dough	Additive-free	Oat	6.4632	53.02	34.685	63.33	111.112
	13	dough	Additive-free	Oat	6.2101	54.64	36.535	61.2	104.191
	14	dough	max	Triticale	8.7883	50.38	29.505	67.44	124.523
	14	dough	max	Triticale	8.6219	52.38	28.25	69.02	122.575
	14	dough	max	Triticale	8.6175	51.55	27.84	69.9	126.136
	14	dough	max	Rye	8.3893	60.13	34.75	59.96	92.7603
	14	dough	max	Rye	8.4356	61.9	36.03	60.78	91.3401
	14	dough	max	Rye	8.4819	59.12	33.54	61.24	96.359
	14	dough	max	Oat	6.3428	53.6	35.82	62.2	107.949
	14	dough	max	Oat	6.8047	52.08	33.56	65.52	117.029
	14	dough	max	Oat	6.0659	53.1	34.465	64.96	113.8
	15	dough	mix	Triticale	8.6567	53.02	29.58	69.54	122.007
	15	dough	mix	Triticale	8.6955	55.64	28.425	71.14	118.937
	15	dough	mix	Triticale	8.5445	52.58	26.925	72.3	127.911
	15	dough	mix	Rye	8.5801	60.32	37.405	58.13	89.6459
	15	dough	mix	Rye	8.2131	62.68	37.71	56.94	84.5045
	15	dough	mix	Rye	8.2718	56.6	36.54	59.88	98.414
	15	dough	mix	Oat	6.9126	53.88	33.415	66.29	114.449
	15	dough	mix	Oat	6.6717	54.46	34.26	64.52	110.207
	15	dough	mix	Oat	6.4749	54.16	34.74	63.32	108.756

## Sheet: Three factors
	forages×stages×additives	Harvest stages	additves	Forage species	CP	NDF	ADF	IVDMD	RFV
	1	heading	Additive-free	Triticale	14.764	50.88	27.53	72.74	132.99
	1	heading	Additive-free	Triticale	14.604	51.08	29.805	71.98	131.085
	1	heading	Additive-free	Triticale	14.258	50.61	30.095	72.06	132.449
	1	heading	Additive-free	Rye	13.586	51.01	30.5	69.14	126.086
	1	heading	Additive-free	Rye	13.1687	49.39	29.945	71.78	135.194
	1	heading	Additive-free	Rye	13.255	50.2	30.69	70.76	131.122
	1	heading	Additive-free	Oat	12.508	46.46	30.94	68.7	137.553
	1	heading	Additive-free	Oat	12.245	46.59	29.74	68.93	137.628
	1	heading	Additive-free	Oat	12.645	45.38	30.755	69	141.441
	2	heading	max	Triticale	13.927	48.5	29.87	70.44	135.104
	2	heading	max	Triticale	14.464	45.96	27.12	73.36	148.481
	2	heading	max	Triticale	14.336	47.95	31.635	71.62	138.943
	2	heading	max	Rye	13.032	47.25	30.765	69.24	136.316
	2	heading	max	Rye	13.205	47.55	29.78	70	136.943
	2	heading	max	Rye	13.12	48.44	31.12	67.72	130.048
	2	heading	max	Oat	13.2	49.92	32.085	64.82	120.789
	2	heading	max	Oat	12.866	46.52	29.555	70.11	140.195
	2	heading	max	Oat	12.583	46.84	28.585	73.54	146.049
	3	heading	mix	Triticale	12.904	49.67	30.48	68.56	128.401
	3	heading	mix	Triticale	12.6162	48.62	28.51	69.98	133.891
	3	heading	mix	Triticale	12.854	51.11	31.01	70.62	128.533
	3	heading	mix	Rye	14.139	48.57	28.37	72.1	138.089
	3	heading	mix	Rye	13.836	46.45	27.53	70.89	141.968
	3	heading	mix	Rye	13.909	45.07	29.46	73.38	151.454
	3	heading	mix	Oat	12.03	48.52	30.39	69.76	133.745
	3	heading	mix	Oat	12.501	48.19	31.27	66.56	128.484
	3	heading	mix	Oat	12.236	47.25	30.33	70.54	138.875
	4	flowering	Additive-free	Triticale	11.702	54.93	37.195	60.36	102.219
	4	flowering	Additive-free	Triticale	11.67	52.92	37.38	59.48	104.554
	4	flowering	Additive-free	Triticale	11.734	54.15	36.605	62.78	107.849
	4	flowering	Additive-free	Rye	10.953	60.12	43.76	54.52	84.3584
	4	flowering	Additive-free	Rye	12.088	63.66	44.01	55.43	80.9972
	4	flowering	Additive-free	Rye	11.62	61.88	43.49	55.14	82.8911
	4	flowering	Additive-free	Oat	11.118	56.58	38.07	60.27	99.09
	4	flowering	Additive-free	Oat	10.679	56.13	36.545	62.76	104.011
	4	flowering	Additive-free	Oat	11.445	59.88	37.345	58.98	91.6251
	5	flowering	max	Triticale	11.302	55.76	36.28	62.62	104.468
	5	flowering	max	Triticale	11.558	54.33	35.92	61.54	105.368
	5	flowering	max	Triticale	11.503	55.36	38.48	60.78	102.131
	5	flowering	max	Rye	12.318	60.18	45.725	51.48	79.5752
	5	flowering	max	Rye	11.752	64.38	41.685	59.1	85.3941
	5	flowering	max	Rye	12.113	62.13	41.285	59.72	89.4149
	5	flowering	max	Oat	11.068	57.32	38.5	59.36	96.3339
	5	flowering	max	Oat	11.435	58.44	36.47	62.78	99.9316
	5	flowering	max	Oat	10.723	58.89	37.28	62.44	98.6309
	6	flowering	mix	Triticale	11.59	53.32	32.86	67	116.89
	6	flowering	mix	Triticale	11.391	56.06	33.87	65.28	108.322
	6	flowering	mix	Triticale	11.328	55.8	32.59	68.14	113.595
	6	flowering	mix	Rye	12.144	59.12	42.59	56.81	89.3886
	6	flowering	mix	Rye	11.963	60.02	43.85	52.78	81.8022
	6	flowering	mix	Rye	12.003	60.77	41.455	58.68	89.824
	6	flowering	mix	Oat	11.042	56.78	35.64	62.99	103.197
	6	flowering	mix	Oat	10.735	58.29	36.69	60.13	95.9597
	6	flowering	mix	Oat	11.319	54.02	33.875	66.76	114.962
	7	grouting	Additive-free	Triticale	11.394	54.67	38.175	64.55	109.834
	7	grouting	Additive-free	Triticale	11.339	54.25	39.08	64.17	110.033
	7	grouting	Additive-free	Triticale	11.178	55.85	37.365	66.78	111.228
	7	grouting	Additive-free	Rye	11.421	62.88	42.335	58.62	86.7211
	7	grouting	Additive-free	Rye	11.471	63.24	43.37	57.73	84.9183
	7	grouting	Additive-free	Rye	11.643	62.87	40.72	57.1	84.4859
	7	grouting	Additive-free	Oat	10.321	59.56	38.67	60.88	95.0849
	7	grouting	Additive-free	Oat	10.684	59.54	40	60.36	94.3044
	7	grouting	Additive-free	Oat	10.147	60.12	37.91	61.4	95.0038
	8	grouting	max	Triticale	12.973	54.89	36.225	67.02	113.58
	8	grouting	max	Triticale	11.748	52.7	34.26	69.94	123.454
	8	grouting	max	Triticale	10.522	53.97	36.325	66.12	113.965
	8	grouting	max	Rye	11.396	58.97	44.55	54.32	85.688
	8	grouting	max	Rye	11.533	61.08	43.455	55.28	84.19
	8	grouting	max	Rye	11.57	60.09	40.26	59.98	92.853
	8	grouting	max	Oat	10.582	59.14	37.835	61.89	97.3488
	8	grouting	max	Oat	10.499	58.68	36.295	61.01	96.7169
	8	grouting	max	Oat	9.9592	61.28	39.85	59.26	89.9569
	9	grouting	mix	Triticale	11.116	51.39	36.97	64.8	117.297
	9	grouting	mix	Triticale	10.459	52.21	37.27	67	119.375
	9	grouting	mix	Triticale	10.595	51.35	38.17	65.78	119.164
	9	grouting	mix	Rye	11.351	65.99	41.64	58.36	82.2676
	9	grouting	mix	Rye	10.984	64.17	42.01	56.67	82.151
	9	grouting	mix	Rye	11.095	62.36	41.615	59.81	89.2194
	9	grouting	mix	Oat	9.3207	58.39	36.85	60.9	97.022
	9	grouting	mix	Oat	9.8435	48.46	34.83	66.1	126.885
	9	grouting	mix	Oat	10.215	56.54	33.02	67.08	110.364
	10	milky	Additive-free	Triticale	9.3918	52.88	31.26	66.08	116.244
	10	milky	Additive-free	Triticale	9.5249	52.78	30.05	66.06	116.429
	10	milky	Additive-free	Triticale	9.406	49.44	29.085	68.18	128.283
	10	milky	Additive-free	Rye	9.2636	58.34	40.02	55.42	88.3673
	10	milky	Additive-free	Rye	10.182	56.16	38.8	55.7	92.2613
	10	milky	Additive-free	Rye	9.7154	58.26	39.99	56.76	90.6282
	10	milky	Additive-free	Oat	9.05	52.18	33.96	64.18	114.416
	10	milky	Additive-free	Oat	9.18	52.76	34.67	64.72	114.11
	10	milky	Additive-free	Oat	8.92	51.36	32.91	65.6	118.815
	11	milky	max	Triticale	9.4911	50.32	27.55	69.66	128.776
	11	milky	max	Triticale	9.2031	51.32	28.3	70.52	127.825
	11	milky	max	Triticale	9.5943	51.9	25.45	72.04	129.121
	11	milky	max	Rye	9.6032	56.46	38.46	62.78	103.436
	11	milky	max	Rye	9.557	57.14	36.89	63.9	104.028
	11	milky	max	Rye	10.141	56.78	39.955	58.78	96.2999
	11	milky	max	Oat	9.25	51.39	31.93	68.32	123.669
	11	milky	max	Oat	10.137	53.74	32.45	67.68	117.153
	11	milky	max	Oat	8.411	48.82	33	65.62	125.035
	12	milky	mix	Triticale	9.4786	52.22	28.92	68.42	121.881
	12	milky	mix	Triticale	9.3825	50.44	27.51	69.28	127.769
	12	milky	mix	Triticale	9.3046	51.33	29.76	68.58	124.285
	12	milky	mix	Rye	9.5712	56.34	39.165	59.33	97.9601
	12	milky	mix	Rye	9.8895	59.78	40.44	57.76	89.8799
	12	milky	mix	Rye	8.6086	57.68	39.145	60.9	98.2163
	12	milky	mix	Oat	8.6011	51.68	33.47	66.44	119.591
	12	milky	mix	Oat	9.167	53.74	32.36	67.38	116.634
	12	milky	mix	Oat	8.4285	55.22	34.35	65.34	110.071
	13	dough	Additive-free	Triticale	8.741	51.54	29.81	68.22	123.129
	13	dough	Additive-free	Triticale	8.488	51.42	28.98	68.72	124.32
	13	dough	Additive-free	Triticale	8.787	54.72	30.9	67.2	114.239
	13	dough	Additive-free	Rye	8.368	59.1	35.38	60.13	94.6445
	13	dough	Additive-free	Rye	8.5089	60	37.77	56.3	87.2868
	13	dough	Additive-free	Rye	8.5303	59.55	38.665	57.01	89.0555
	13	dough	Additive-free	Oat	6.712	55.66	34.425	63.93	106.845
	13	dough	Additive-free	Oat	6.4632	53.02	34.685	63.33	111.112
	13	dough	Additive-free	Oat	6.2101	54.64	36.535	61.2	104.191
	14	dough	max	Triticale	8.7883	50.38	29.505	67.44	124.523
	14	dough	max	Triticale	8.6219	52.38	28.25	69.02	122.575
	14	dough	max	Triticale	8.6175	51.55	27.84	69.9	126.136
	14	dough	max	Rye	8.3893	60.13	34.75	59.96	92.7603
	14	dough	max	Rye	8.4356	61.9	36.03	60.78	91.3401
	14	dough	max	Rye	8.4819	59.12	33.54	61.24	96.359
	14	dough	max	Oat	6.3428	53.6	35.82	62.2	107.949
	14	dough	max	Oat	6.8047	52.08	33.56	65.52	117.029
	14	dough	max	Oat	6.0659	53.1	34.465	64.96	113.8
	15	dough	mix	Triticale	8.6567	53.02	29.58	69.54	122.007
	15	dough	mix	Triticale	8.6955	55.64	28.425	71.14	118.937
	15	dough	mix	Triticale	8.5445	52.58	26.925	72.3	127.911
	15	dough	mix	Rye	8.5801	60.32	37.405	58.13	89.6459
	15	dough	mix	Rye	8.2131	62.68	37.71	56.94	84.5045
	15	dough	mix	Rye	8.2718	56.6	36.54	59.88	98.414
	15	dough	mix	Oat	6.9126	53.88	33.415	66.29	114.449
	15	dough	mix	Oat	6.6717	54.46	34.26	64.52	110.207
	15	dough	mix	Oat	6.4749	54.16	34.74	63.32	108.756

## Sheet: Topsis
	After added with C1	Key indicator
			A1B1	A2B1	A3B1	A1B2	A2B2	A3B2	A1B3	A2B3	A3B3	A1B4	A2B4	A3B4	A1B5	A2B5	A3B5	Forward indicator	Negative indicator
		DMY	7.17	8.19	6.57	9.76	9.57	9.1	10.96	10.96	9.87	14.12	11.62	10.66	17.84	12.04	11.39	17.84	6.57
		CP	14.24	13.12	12.88	11.45	12.06	11.08	11.75	11.5	10.35	9.43	9.77	9.27	8.68	8.44	6.4	14.24	6.4
		NDF	47.47	47.75	47.76	55.15	62.23	58.22	53.85	60.05	59.7	51.18	56.79	51.32	51.44	60.38	52.93	62.23	47.47
		ADF	29.54	30.56	30.08	36.89	42.9	37.42	35.6	42.76	37.99	27.1	38.44	32.46	28.53	34.77	34.62	42.9	27.1
		IVDMD	71.81	68.99	69.49	61.65	56.77	61.53	67.69	56.53	60.72	70.74	61.82	67.21	68.79	60.66	64.23	71.81	56.53
		RFV	140.84	134.44	135.68	103.99	84.79	98.3	117	87.58	94.68	128.58	101.26	121.95	124.41	93.49	112.93	140.84	84.79
																		0	0
		Weight coefficient	DMY	0.35					7.71	8.95	6.8
			CP	0.2					10.56	9.99	9.54
			NDF	0.1					11.94	12.16	10.81
			ADF	0.05					15.47	12.64	11.51
			IVDMD	0.15					19.45	13.11	12.32
			RFV	0.15
		A1	1	0.1011	7.70787	0.1	efg		7.71	7.71
			2	0.300187	10.5578	0.1	cdef		10.56	10.56
			3	0.501063	11.9376	0.2	cde		11.94	11.94
			4	0.701751	15.4663	0.2	b		15.47	15.47
			5	0.900077	19.4469	0.3	a		19.45	19.45
		A2	1	0.100992	8.95191	0.1	fg		8.95	8.95
			2	0.300236	9.9923	0.1	cdef		9.99	9.99
			3	0.501043	12.1638	0.1	cde		12.16	12.16
			4	0.701998	12.6389	0.2	bcd		12.64	12.64
			5	0.901292	13.1138	0.2	bc		13.11	13.11
		A3	1	0.10118	6.80312	0.1	g		6.8	6.8
			2	0.300276	9.53992	0.1	defg		9.54	9.54
			3	0.501162	10.8067	0.1	cdef		10.81	10.81
			4	0.700436	11.5078	0.2	cde		11.51	11.51
			5	0.901362	12.3222	0.2	cd		12.32	12.32			19.45	6.8
													14.56	0.82
													4.56	3.78
			Forward indicator	DMY	17.84				Negative indicator	NDF	47.47		2.72	1.29
				CP	14.24					ADF	27.1		0.52	0.09
				IVDMD	71.81								8.81	3.12
				RFV	140.84
		Nondimensionalize
		indicator	A1B1	A2B1	A3B1	A1B2	A2B2	A3B2	A1B3	A2B3	A3B3	A1B4	A2B4	A3B4	A1B5	A2B5	A3B5
		DMY	0.401906	0.459081	0.368274	0.547085	0.536435	0.51009	0.61435	0.61435	0.553251	0.79148	0.651345	0.597534	1	0.674888	0.638453
		CP	1	0.921348	0.904494	0.804073	0.84691	0.77809	0.82514	0.807584	0.726826	0.662219	0.686096	0.650983	0.609551	0.592697	0.449438
		NDF	1	0.994136	0.993928	0.860743	0.762815	0.815356	0.881523	0.790508	0.795142	0.927511	0.835887	0.924981	0.922823	0.786187	0.896845
		ADF	0.9174	0.88678	0.900931	0.734616	0.631702	0.724212	0.761236	0.63377	0.713346	1	0.704995	0.834874	0.949877	0.779408	0.782785
		IVDMD	1	0.96073	0.967693	0.858516	0.790558	0.856844	0.942626	0.787216	0.845565	0.9851	0.860883	0.935942	0.957945	0.844729	0.894444
		RFV	1	0.954558	0.963363	0.738356	0.602031	0.697955	0.83073	0.62184	0.672252	0.912951	0.718972	0.865876	0.883343	0.663803	0.801832
		Weight coefficient	DMY	0.35
			CP	0.2
			NDF	0.1
			ADF	0.05
			IVDMD	0.15
			RFV	0.15
		absolute different R
		indicator	A1B1	A2B1	A3B1	A1B2	A2B2	A3B2	A1B3	A2B3	A3B3	A1B4	A2B4	A3B4	A1B5	A2B5	A3B5	最大值	最小值
		DMY	0.140667	0.160678	0.128896	0.19148	0.187752	0.178531	0.215022	0.215022	0.193638	0.277018	0.227971	0.209137	0.35	0.236211	0.223459	0.35	0.128896
		CP	0.2	0.18427	0.180899	0.160815	0.169382	0.155618	0.165028	0.161517	0.145365	0.132444	0.137219	0.130197	0.12191	0.118539	0.0898876	0.18427	0.0898876
		NDF	0.1	0.0994136	0.0993928	0.0860743	0.0762815	0.0815356	0.0881523	0.0790508	0.0795142	0.0927511	0.0835887	0.0924981	0.0922823	0.0786187	0.0896845	0.0994136	0.0762815
		ADF	0.04587	0.044339	0.0450465	0.0367308	0.0315851	0.0362106	0.0380618	0.0316885	0.0356673	0.05	0.0352497	0.0417437	0.0474939	0.0389704	0.0391392	0.05	0.0315851
		IVDMD	0.15	0.144109	0.145154	0.128777	0.118584	0.128527	0.141394	0.118082	0.126835	0.147765	0.129132	0.140391	0.143692	0.126709	0.134167	0.147765	0.118082
		RFV	0.15	0.143184	0.144504	0.110753	0.0903046	0.104693	0.124609	0.0932761	0.100838	0.136943	0.107846	0.129881	0.132501	0.0995704	0.120275	0.144504	0.0903046
	Ideal solution Series	Xi+	0.35	0.18427	0.0994136	0.05	0.147765	0.144504
	Negative Ideal solution Series	Xi—	0.128896	0.0898876	0.0762815	0.0315851	0.118082	0.0903046
		Xi+	0.35	0.4	0.4	0.4	0.4	0.4	0.4	0.4	0.4	0.4	0.4	0.4	0.4	0.4	0.4
			0.18427	0.0921	0.0921	0.0921	0.0921	0.0921	0.0921	0.0921	0.0921	0.0921	0.0921	0.0921	0.0921	0.0921	0.0921
			0.0994136	0.0497	0.0497	0.0497	0.0497	0.0497	0.0497	0.0497	0.0497	0.0497	0.0497	0.0497	0.0497	0.0497	0.0497
			0.05	0.05	0.05	0.05	0.05	0.05	0.05	0.05	0.05	0.05	0.05	0.05	0.05	0.05	0.05
			0.147765	0.1478	0.1478	0.1478	0.1478	0.1478	0.1478	0.1478	0.1478	0.1478	0.1478	0.1478	0.1478	0.1478	0.1478
			0.144504	0.0501	0.0501	0.0501	0.0501	0.0501	0.0501	0.0501	0.0501	0.0501	0.0501	0.0501	0.0501	0.0501	0.0501
			the difference
	Si+	DMY	-0.209333	-0.239322	-0.271104	-0.20852	-0.212248	-0.221469	-0.184978	-0.184978	-0.206362	-0.122982	-0.172029	-0.190863	-0.05	-0.163789	-0.176541
		CP	0.0157303	0.0921697	0.0887989	0.0687146	0.077282	0.063518	0.0729281	0.0694169	0.0532652	0.0403438	0.0451191	0.0380966	0.0298101	0.0264393	-0.00221236
		NDF	0.000586387	0.0497136	0.0496928	0.0363743	0.0265815	0.0318356	0.0384523	0.0293508	0.0298142	0.0430511	0.0338887	0.0427981	0.0425823	0.0289187	0.0399845
		ADF	-0.00412999	-0.00566099	-0.00495346	-0.0132692	-0.0184149	-0.0137894	-0.0119382	-0.0183115	-0.0143327	0	-0.0147503	-0.00825632	-0.00250613	-0.0110296	-0.0108608
		IVDMD	0.00223506	-0.00369054	-0.00264612	-0.0190227	-0.0292162	-0.0192733	-0.00640604	-0.0297176	-0.0209653	-3.50648e-05	-0.0186676	-0.00740869	-0.00410831	-0.0210906	-0.0136334
		RFV	0.0054956	0.0930838	0.0944044	0.0606533	0.0402046	0.0545933	0.0745095	0.0431761	0.0507378	0.0868426	0.0577458	0.0797814	0.0824014	0.0494704	0.0701748
			square
		DMY	0.0438203	0.0572749	0.0734975	0.0434807	0.0450491	0.0490483	0.0342167	0.0342167	0.0425853	0.0151246	0.029594	0.0364288	0.0025	0.0268269	0.0311669
		CP	0.000247444	0.00849525	0.00788524	0.0047217	0.00597251	0.00403453	0.00531851	0.0048187	0.00283718	0.00162762	0.00203573	0.00145135	0.000888643	0.000699038	4.89453e-06
		NDF	3.4385e-07	0.00247144	0.00246937	0.00132309	0.000706578	0.0010135	0.00147858	0.000861469	0.000888889	0.0018534	0.00114844	0.00183167	0.00181325	0.000836294	0.00159876
		ADF	1.70568e-05	3.20469e-05	2.45367e-05	0.000176071	0.000339109	0.000190148	0.000142521	0.000335311	0.000205427	0	0.00021757	6.81667e-05	6.28071e-06	0.000121653	0.000117956
		IVDMD	4.99551e-06	1.36201e-05	7.00196e-06	0.000361862	0.000853589	0.000371461	4.10374e-05	0.000883133	0.000439544	1.22954e-09	0.000348478	5.48887e-05	1.68782e-05	0.000444815	0.000185871
		RFV	3.02016e-05	0.00866459	0.00891219	0.00367883	0.00161641	0.00298043	0.00555166	0.00186417	0.00257433	0.00754164	0.00333458	0.00636508	0.00678999	0.00244732	0.0049245
		summation	0.0441203	0.0769518	0.0927959	0.0537422	0.0545373	0.0576384	0.046749	0.0429795	0.0495307	0.0261473	0.0366788	0.0461999	0.012015	0.031376	0.0379989
		extraction of square root	0.210048	0.277402	0.304624	0.231824	0.233532	0.24008	0.216215	0.207315	0.222555	0.161701	0.191517	0.214942	0.109613	0.177133	0.194933
		Si+	A1B1	A2B1	A3B1	A1B2	A2B2	A3B2	A1B3	A2B3	A3B3	A1B4	A2B4	A3B4	A1B5	A2B5	A3B5
			0.21	0.2774	0.3046	0.2318	0.2335	0.2401	0.2162	0.2073	0.2226	0.1617	0.1915	0.2149	0.1096	0.1771	0.1949
			0.21	0.2774	0.3046	0.2318	0.2335	0.2401	0.2162	0.2073	0.2226	0.1617	0.1915	0.2149	0.1096	0.1771	0.1949
					Si+
				B1	0.21
				B2	0.2318
			A1	B3	0.2162
				B4	0.1617
				B5	0.1096
				B1	0.2774
				B2	0.2335
			A2	B3	0.2073
				B4	0.1915
				B5	0.1771
				B1	0.3046
				B2	0.2401
			A3	B3	0.2226
				B4	0.2149
				B5	0.1949
	Si—	absolute different R
		指标	A1B1	A2B1	A3B1	A1B2	A2B2	A3B2	A1B3	A2B3	A3B3	A1B4	A2B4	A3B4	A1B5	A2B5	A3B5	最大值	最小值
		DMY	0.140667	0.160678	0.128896	0.19148	0.187752	0.178531	0.215022	0.215022	0.193638	0.277018	0.227971	0.209137	0.35	0.236211	0.223459	0.35	0.128896
		CP	0.2	0.18427	0.180899	0.160815	0.169382	0.155618	0.165028	0.161517	0.145365	0.132444	0.137219	0.130197	0.12191	0.118539	0.0898876	0.2	0.0898876
		NDF	0.1	0.0994136	0.0993928	0.0860743	0.0762815	0.0815356	0.0881523	0.0790508	0.0795142	0.0927511	0.0835887	0.0924981	0.0922823	0.0786187	0.0896845	0.1	0.0762815
		ADF	0.04587	0.044339	0.0450465	0.0367308	0.0315851	0.0362106	0.0380618	0.0316885	0.0356673	0.05	0.0352497	0.0417437	0.0474939	0.0389704	0.0391392	0.05	0.0315851
		IVDMD	0.15	0.144109	0.145154	0.128777	0.118584	0.128527	0.141394	0.118082	0.126835	0.147765	0.129132	0.140391	0.143692	0.126709	0.134167	0.15	0.118082
		RFV	0.15	0.143184	0.144504	0.110753	0.0903046	0.104693	0.124609	0.0932761	0.100838	0.136943	0.107846	0.129881	0.132501	0.0995704	0.120275	0.15	0.0903046
		Xi—	0.128896	0.0898876	0.0762815	0.0315851	0.118082	0.0903046	0
		Xi—	0.128896	0.128896	0.128896	0.128896	0.128896	0.128896	0.128896	0.128896	0.128896	0.128896	0.128896	0.128896	0.128896	0.128896	0.128896
			0.0898876	0.0898876	0.0898876	0.0898876	0.0898876	0.0898876	0.0898876	0.0898876	0.0898876	0.0898876	0.0898876	0.0898876	0.0898876	0.0898876	0.0898876
			0.0762815	0.0762815	0.0762815	0.0762815	0.0762815	0.0762815	0.0762815	0.0762815	0.0762815	0.0762815	0.0762815	0.0762815	0.0762815	0.0762815	0.0762815
			0.0315851	0.0315851	0.0315851	0.0315851	0.0315851	0.0315851	0.0315851	0.0315851	0.0315851	0.0315851	0.0315851	0.0315851	0.0315851	0.0315851	0.0315851
			0.118082	0.118082	0.118082	0.118082	0.118082	0.118082	0.118082	0.118082	0.118082	0.118082	0.118082	0.118082	0.118082	0.118082	0.118082
			0.0903046	0.0903046	0.0903046	0.0903046	0.0903046	0.0903046	0.0903046	0.0903046	0.0903046	0.0903046	0.0903046	0.0903046	0.0903046	0.0903046	0.0903046
			0	0	0	0	0	0	0	0	0	0	0	0	0	0	0
		the differnece
	Si—	DMY	0.0117713	0.0317825	0	0.0625841	0.0588565	0.0496357	0.0861267	0.0861267	0.0647422	0.148122	0.0990751	0.080241	0.221104	0.107315	0.0945628
		CP	0.110112	0.094382	0.0910112	0.070927	0.0794944	0.0657303	0.0751404	0.0716292	0.0554775	0.0425562	0.0473315	0.040309	0.0320225	0.0286517	0
		NDF	0.0237185	0.0231321	0.0231113	0.00979281	0	0.00525402	0.0118707	0.00276925	0.0032327	0.0164695	0.00730712	0.0162165	0.0160007	0.00233721	0.013403
		ADF	0.0142849	0.0127539	0.0134615	0.00514574	0	0.0046255	0.00647672	0.000103412	0.0040822	0.0184149	0.00366466	0.0101586	0.0159088	0.0073853	0.00755414
		IVDMD	0.0319176	0.026027	0.0270714	0.0106949	0.000501323	0.0104442	0.0233115	0	0.00875226	0.0296825	0.01105	0.0223089	0.0256092	0.00862693	0.0160841
		RFV	0.0596954	0.0528792	0.0541998	0.0204487	0	0.0143887	0.0343049	0.00297146	0.0105332	0.046638	0.0175412	0.0395768	0.0421968	0.00926583	0.0299702
			0	0	0	0	0	0	0	0	0	0	0	0	0	0	0
		square
	Si—	DMY	0.000138564	0.00101013	0	0.00391677	0.00346409	0.0024637	0.00741781	0.00741781	0.00419155	0.0219402	0.00981588	0.00643862	0.0488871	0.0115165	0.00894212
		CP	0.0121247	0.00890797	0.00828305	0.00503063	0.00631936	0.00432048	0.00564609	0.00513074	0.00307776	0.00181103	0.00224027	0.00162481	0.00102544	0.000820919	0
		NDF	0.000562566	0.000535093	0.00053413	9.58991e-05	0	2.76047e-05	0.000140914	7.66877e-06	1.04504e-05	0.000271246	5.33941e-05	0.000262975	0.000256024	5.46256e-06	0.000179639
		ADF	0.000204059	0.000162663	0.000181211	2.64786e-05	0	2.13953e-05	4.19479e-05	1.06941e-08	1.66644e-05	0.000339109	1.34297e-05	0.000103197	0.000253089	5.45426e-05	5.70651e-05
		IVDMD	0.00101873	0.000677406	0.000732863	0.000114381	2.51325e-07	0.000109082	0.000543427	0	7.66021e-05	0.000881051	0.000122102	0.000497686	0.000655834	7.4424e-05	0.000258699
		RFV	0.00356354	0.0027962	0.00293762	0.000418151	0	0.000207034	0.00117683	8.82956e-06	0.000110949	0.00217511	0.000307693	0.00156633	0.00178057	8.58557e-05	0.000898212
			0	0	0	0	0	0	0	0	0	0	0	0	0	0	0
		summation	0.0176122	0.0140895	0.0126689	0.00960231	0.0097837	0.00714929	0.014967	0.0125651	0.00748397	0.0274177	0.0125528	0.0104936	0.0528581	0.0125577	0.0103357
		extraction of square root	0.132711	0.118699	0.112556	0.0979914	0.0989126	0.0845535	0.12234	0.112094	0.0865099	0.165583	0.112039	0.102438	0.229909	0.112061	0.101665
	Si—	A1B1	A2B1	A3B1	A1B2	A2B2	A3B2	A1B3	A2B3	A3B3	A1B4	A2B4	A3B4	A1B5	A2B5	A3B5
		0.1327	0.1187	0.1126	0.098	0.0989	0.0846	0.1223	0.1121	0.0865	0.1656	0.112	0.1024	0.2299	0.1121	0.1017
		0.1327	0.1187	0.1126	0.098	0.0989	0.0846	0.1223	0.1121	0.0865	0.1656	0.112	0.1024	0.2299	0.1121	0.1017
				Si—
			B1	0.1327
			B2	0.098
		A1	B3	0.1223
			B4	0.1656
			B5	0.2299
			B1	0.1187
			B2	0.0989
		A2	B3	0.1121
			B4	0.112
			B5	0.1121
			B1	0.1126
			B2	0.0846
		A3	B3	0.0865
			B4	0.1024
			B5	0.1017
				Si+	Si—	Ci
			B1	0.21	0.1327	0.387219	2		0.387219		0.505958	1
			B2	0.2318	0.098	0.29715	10		0.29715		0.387219	2
		A1	B3	0.2162	0.1223	0.3613	4		0.3613		0.369028	3
			B4	0.1617	0.1656	0.505958	1		0.505958		0.3613	4
			B5	0.1096	0.2299	0.2585	14		0.2585		0.350971	5
			B1	0.2774	0.1187	0.299672	8		0.299672		0.342886	6
			B2	0.2335	0.0989	0.297533	9		0.297533		0.322723	7
		A2	B3	0.2073	0.1121	0.350971	5		0.350971		0.299672	8
			B4	0.1915	0.112	0.369028	3		0.369028		0.297533	9
			B5	0.1771	0.1121	0.1411	15		0.1411		0.29715	10
			B1	0.3046	0.1126	0.269895	12		0.269895		0.279845	11
			B2	0.2401	0.0846	0.260548	13		0.260548		0.269895	12
		A3	B3	0.2226	0.0865	0.279845	11		0.279845		0.260548	13
			B4	0.2149	0.1024	0.322723	7		0.322723		0.2585	14
			B5	0.1949	0.1017	0.342886	6		0.342886		0.1411	15
		Forage materials	Cutting stages	D+	D-	Ci	Rank
			B1	0.21	0.1327	0.387219	2
			B2	0.2318	0.098	0.29715	10
		A1	B3	0.2162	0.1223	0.3613	4
			B4	0.1617	0.1656	0.505958	1
			B5	0.1096	0.2299	0.2585	14
			B1	0.2774	0.1187	0.299672	8
			B2	0.2335	0.0989	0.297533	9
		A2	B3	0.2073	0.1121	0.350971	5
			B4	0.1915	0.112	0.369028	3
			B5	0.1771	0.1121	0.1411	15
			B1	0.3046	0.1126	0.269895	12
			B2	0.2401	0.0846	0.260548	13
		A3	B3	0.2226	0.0865	0.279845	11
			B4	0.2149	0.1024	0.322723	7
			B5	0.1949	0.1017	0.342886	6
